# Supplementary material for: Outbreak.info Research Library: A standardized, searchable platform to discover and explore COVID-19 resources
Source: Research Square preprint supplement (doi:10.21203/rs.3.rs-1723808/v1), 2022-06-28
Supplement: Supplementary file 1 [file b46a0b5edb488aca0ce5dbf2.pdf]

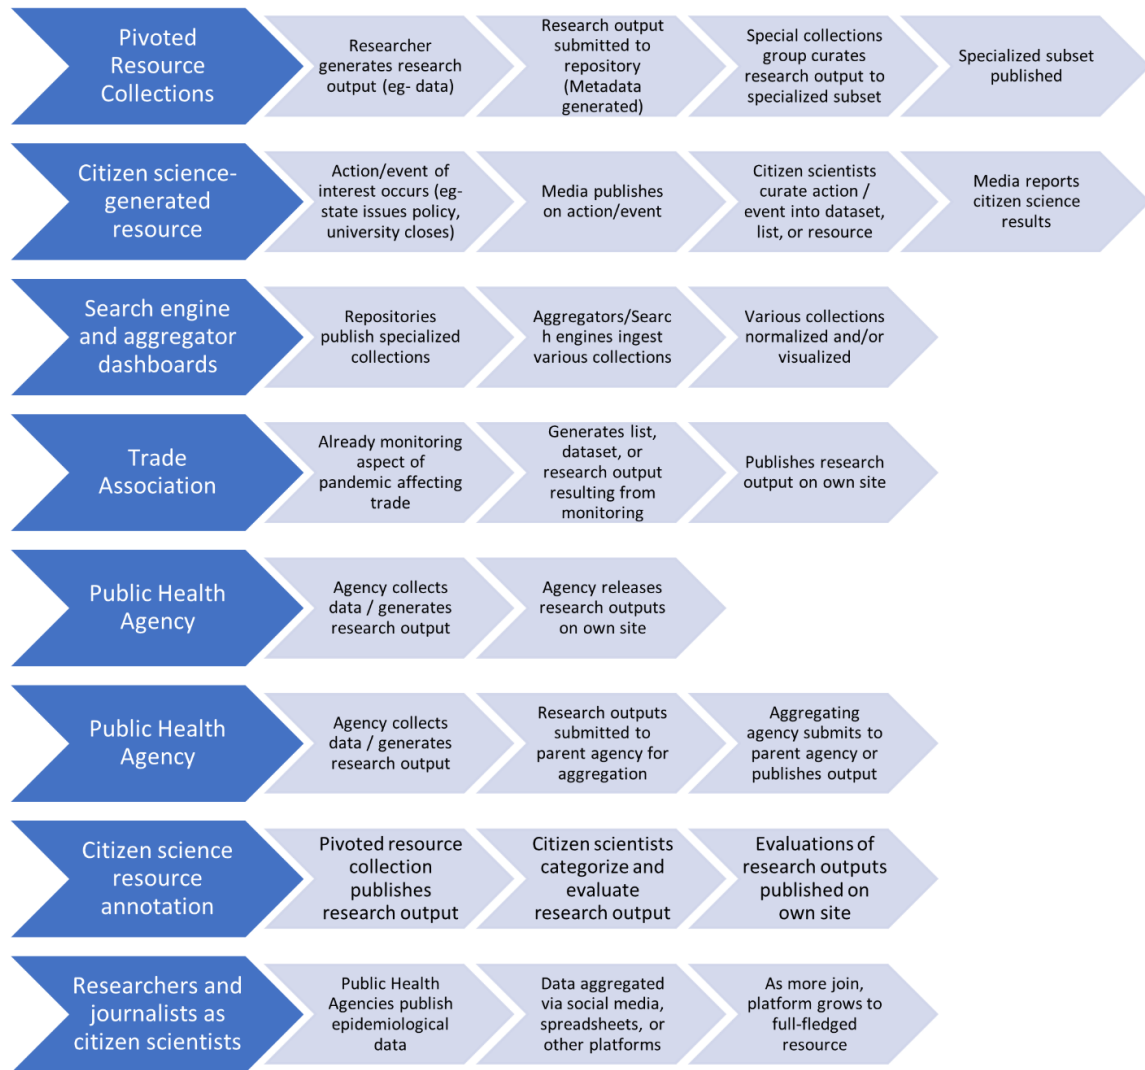

**Supplemental Figure 1.** Example resource-generation pipelines observed within the first month of the pandemic, resulting in a highly-fragmented, non-standardized resource landscape that is difficult to search, centralize and leverage.

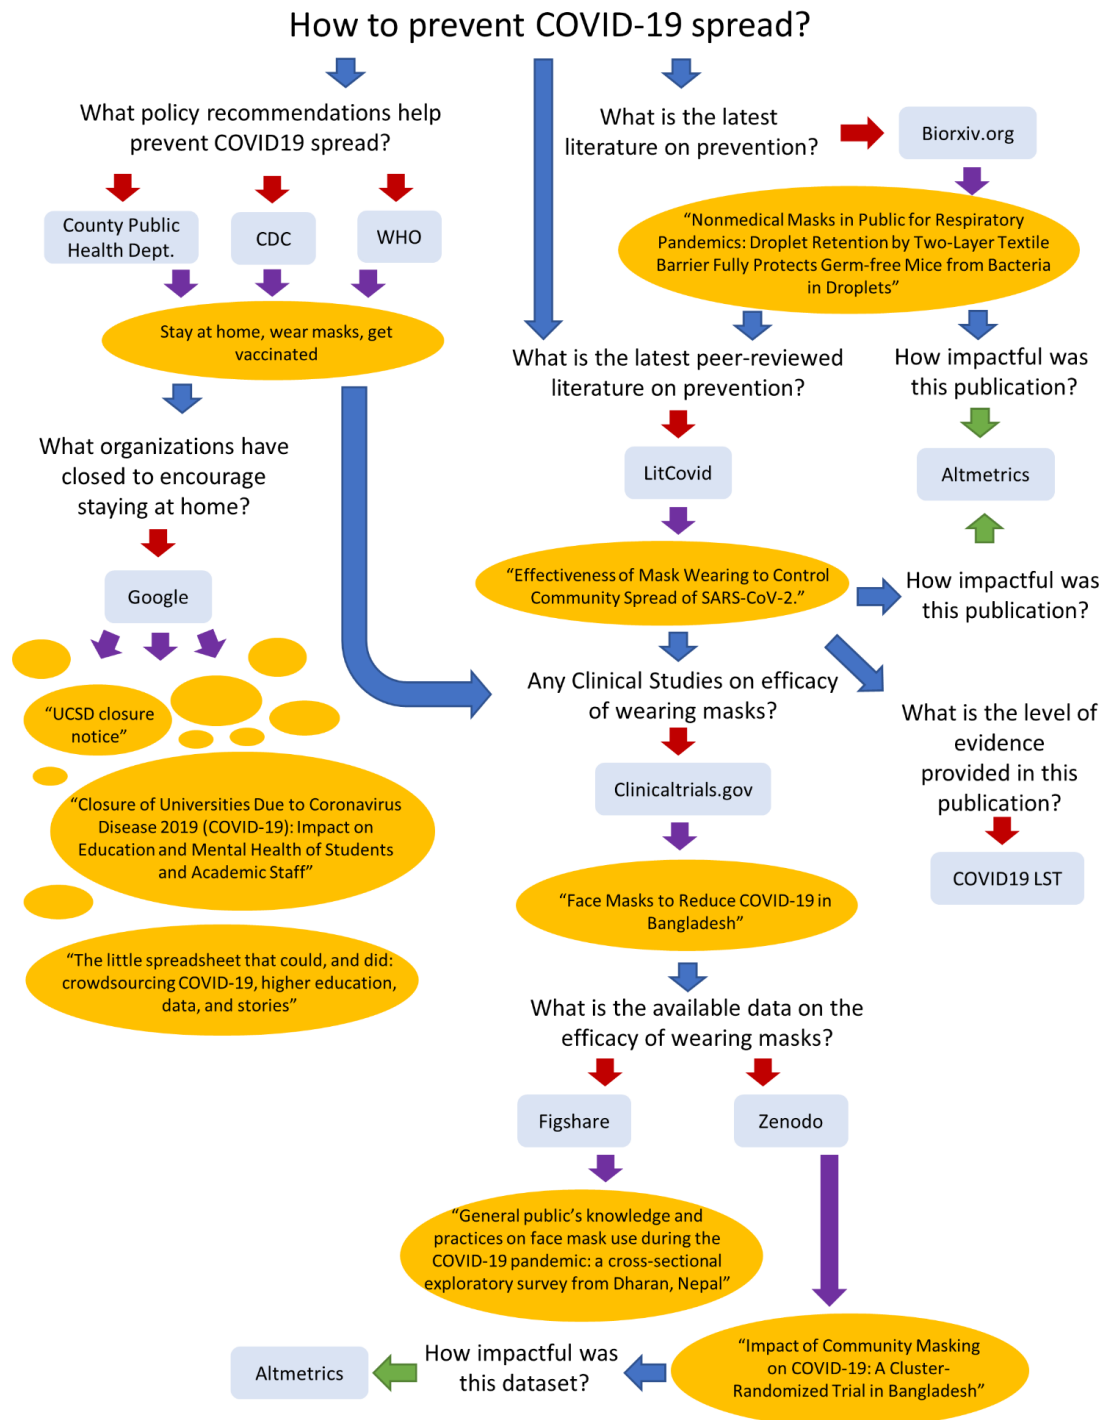

**Supplemental Figure 2.** Example resource exploration pathway for addressing the question, "How to prevent COVID-19 spread" early on in the pandemic. The question leads to an iterative process of refining the question (unbound text), searching a resource/website (blue rounded box), finding a result of interest (orange oval). Blue arrows indicate a question refinement step. Purple arrows indicate a result review step (i.e.- identifying a potential result of interest). Red arrows indicate a manual search and filter step. Green arrows indicate linked search (i.e.- manual input to a resource not needed for result).
